# Supplementary material for: Fatty Acid, Lipid Classes and Phospholipid Molecular Species Composition of the Marine Clam Meretrix lyrata (Sowerby 1851) from Cua Lo Beach, Nghe An Province, Vietnam
Source: PubMed Central journal article supplement (PMC6429517; doi:10.3390/molecules24050895), 2019-03-04
Supplement: molecules-24-00895-s001.pdf [file molecules-24-00895-s001.pdf]

## Supplementary A: Tables

**Table S1.** The composition of molecular species of phosphatidylethanolamine (PE) from the clams.

| PL      | Symbol                | M+       | Formula                                           | Area     | % in PE |
|---------|-----------------------|----------|---------------------------------------------------|----------|---------|
| PE 33:1 | p17:0/16:1            | 688.5269 | C <sub>38</sub> H <sub>74</sub> NO <sub>7</sub> P | 1497699  | 1.6     |
| PE 34:1 | p18:0/16:1 p16:0/18:1 | 702.5410 | C <sub>39</sub> H <sub>76</sub> NO <sub>7</sub> P | 5712376  | 6.0     |
| PE 35:1 | p17:0/18:1            | 716.5575 | C <sub>40</sub> H <sub>78</sub> NO <sub>7</sub> P | 4716264  | 5.0     |
| PE 36:1 | p18:0/18:1            | 730.5794 | C <sub>41</sub> H <sub>80</sub> NO <sub>7</sub> P | 14652116 | 15.4    |
| PE 38:5 | p18:0/20:5            | 750.5444 | C <sub>43</sub> H <sub>76</sub> NO <sub>7</sub> P | 3211714  | 3.4     |
| PE 38:2 | p18:0/20:2            | 756.5835 | C <sub>43</sub> H <sub>82</sub> NO <sub>7</sub> P | 5720469  | 6.0     |
| PE 38:1 | p18:0/20:1            | 758.6006 | C <sub>43</sub> H <sub>84</sub> NO <sub>7</sub> P | 1178033  | 1.2     |
| PE 39:7 | p17:0/22:6            | 762.5406 | C <sub>44</sub> H <sub>76</sub> NO <sub>7</sub> P | 1574842  | 1.7     |
| PE 39:5 | p17:0/22:5            | 764.5537 | C <sub>44</sub> H <sub>78</sub> NO <sub>7</sub> P | 2309139  | 2.4     |
| PE 39:1 | p17:0/22:2            | 770.6018 | C <sub>44</sub> H <sub>84</sub> NO <sub>7</sub> P | 1566703  | 1.6     |
| PE 40:6 | p18:0/22:6            | 776.5556 | C <sub>45</sub> H <sub>78</sub> NO <sub>7</sub> P | 16448856 | 17.3    |
| PE 40:5 | p18:0/22:5            | 778.5704 | C <sub>45</sub> H <sub>80</sub> NO <sub>7</sub> P | 4784699  | 5.0     |
| PE 40:3 | p18:0/22:3            | 782.5966 | C <sub>45</sub> H <sub>84</sub> NO <sub>7</sub> P | 2470761  | 2.6     |
| PE 40:2 | p18:0/22:2            | 784.6161 | C <sub>45</sub> H <sub>86</sub> NO <sub>7</sub> P | 9756482  | 10.3    |
| PE 41:2 | p19:0/22:2            | 798.6334 | C <sub>46</sub> H <sub>88</sub> NO <sub>7</sub> P | 741412   | 0.8     |
| PE 34:2 | 16:1/18:1             | 716.5323 | C <sub>39</sub> H <sub>74</sub> NO <sub>8</sub> P | 646687   | 0.7     |
| PE 34:1 | 16:0/18:1             | 718.5409 | C <sub>39</sub> H <sub>76</sub> NO <sub>8</sub> P | 804239   | 0.8     |
| PE 35:2 | 17:0/18:1             | 730.5411 | C <sub>40</sub> H <sub>76</sub> NO <sub>8</sub> P | 291277   | 0.3     |
| PE 36:2 | 18:1/18:1             | 744.5492 | C <sub>41</sub> H <sub>78</sub> NO <sub>8</sub> P | 2182317  | 2.3     |
| PE 38:6 | 16:0/22:6             | 764.5172 | C <sub>43</sub> H <sub>74</sub> NO <sub>8</sub> P | 1158820  | 1.2     |
| PE 38:5 | 18:0/20:5             | 766.5337 | C <sub>43</sub> H <sub>76</sub> NO <sub>8</sub> P | 1763964  | 1.9     |
| PE 38:4 | 18:0/20:4             | 768.5506 | C <sub>43</sub> H <sub>78</sub> NO <sub>8</sub> P | 1012322  | 1.1     |
| PE 38:2 | 18:1/20:1             | 772.6211 | C <sub>43</sub> H <sub>84</sub> NO <sub>8</sub> P | 156987   | 0.2     |
| PE 39:6 | 17:0/22:6             | 778.5323 | C <sub>44</sub> H <sub>76</sub> NO <sub>8</sub> P | 2609124  | 2.7     |
| PE 40:7 | 18:1/22:6             | 790.5287 | C <sub>45</sub> H <sub>76</sub> NO <sub>8</sub> P | 1893480  | 2.0     |
| PE 40:6 | 18:0/22:6             | 792.5457 | C <sub>45</sub> H <sub>78</sub> NO <sub>8</sub> P | 4423247  | 4.7     |
| PE 40:5 | 18:0/22:5             | 794.5604 | C <sub>45</sub> H <sub>80</sub> NO <sub>8</sub> P | 1696335  | 1.8     |
| PE 40:2 |                       | 800.6117 | C <sub>45</sub> H <sub>86</sub> NO <sub>8</sub> P | 134525.0 | 0.1     |

**Table S2.** The composition of molecular species of phosphatidylcholine (PC) from the clams.

| PL      | Symbol     | M+       | Formula                                           | Area    | % in PC |
|---------|------------|----------|---------------------------------------------------|---------|---------|
| PC 34:1 | a17:0/17:1 | 746.5933 | C <sub>42</sub> H <sub>84</sub> NO <sub>7</sub> P | 165641  | 0.1     |
| PC 36:4 |            | 768.5833 | C <sub>44</sub> H <sub>82</sub> NO <sub>7</sub> P | 4575096 | 2.7     |
| PC 36:2 | a14:0/22:2 | 772.5198 | C <sub>44</sub> H <sub>86</sub> NO <sub>7</sub> P | 1241394 | 0.7     |
| PC 36:1 |            | 774.6346 | C <sub>44</sub> H <sub>88</sub> NO <sub>7</sub> P | 2979147 | 1.8     |
| PC 37:5 |            | 780.5825 | C <sub>45</sub> H <sub>82</sub> NO <sub>7</sub> P | 367053  | 0.2     |

|         |            |          |                                                   |          |      |
|---------|------------|----------|---------------------------------------------------|----------|------|
| PC 37:4 |            | 782.6174 | C <sub>45</sub> H <sub>84</sub> NO <sub>7</sub> P | 1177555  | 0.7  |
| PC 38:6 | a16:0/22:6 | 792.5846 | C <sub>46</sub> H <sub>82</sub> NO <sub>7</sub> P | 7956790  | 4.7  |
| PC 38:5 |            | 794.5848 | C <sub>46</sub> H <sub>84</sub> NO <sub>7</sub> P | 6071400  | 3.6  |
| PC 38:2 |            | 800.6423 | C <sub>46</sub> H <sub>90</sub> NO <sub>7</sub> P | 1861346  | 1.1  |
| PC 40:7 |            | 818.6027 | C <sub>48</sub> H <sub>84</sub> NO <sub>7</sub> P | 11142834 | 6.6  |
| PC 40:6 | a18:0/22:6 | 820.6153 | C <sub>48</sub> H <sub>86</sub> NO <sub>7</sub> P | 14290935 | 8.5  |
| PC 30:1 |            | 704.5226 | C <sub>38</sub> H <sub>74</sub> NO <sub>8</sub> P | 2979567  | 1.8  |
| PC 30:0 |            | 706.5400 | C <sub>38</sub> H <sub>76</sub> NO <sub>8</sub> P | 9416695  | 5.6  |
| PC 32:2 |            | 730.5404 | C <sub>40</sub> H <sub>76</sub> NO <sub>8</sub> P | 2128977  | 1.3  |
| PC 32:1 |            | 732.5525 | C <sub>40</sub> H <sub>78</sub> NO <sub>8</sub> P | 17516824 | 10.4 |
| PC 34:5 |            | 752.5319 | C <sub>42</sub> H <sub>74</sub> NO <sub>8</sub> P | 1297666  | 0.8  |
| PC 34:4 |            | 754.5408 | C <sub>42</sub> H <sub>76</sub> NO <sub>8</sub> P | 5115775  | 3.0  |
| PC 34:3 |            | 756.5518 | C <sub>42</sub> H <sub>78</sub> NO <sub>8</sub> P | 4902910  | 2.9  |
| PC 34:1 | 17:0/17:1  | 760.5813 | C <sub>42</sub> H <sub>82</sub> NO <sub>8</sub> P | 17236303 | 10.2 |
| PC 36:6 |            | 778.5467 | C <sub>44</sub> H <sub>76</sub> NO <sub>8</sub> P | 2273993  | 1.3  |
| PC 36:5 | 16:0/20:5  | 780.5542 | C <sub>44</sub> H <sub>78</sub> NO <sub>8</sub> P | 5061395  | 3.0  |
| PC 36:4 |            | 782.5708 | C <sub>44</sub> H <sub>80</sub> NO <sub>8</sub> P | 5088689  | 3.0  |
| PC 36:2 | 14:0/22:2  | 786.6157 | C <sub>44</sub> H <sub>84</sub> NO <sub>8</sub> P | 3702615  | 2.2  |
| PC 38:6 | 16:0/22:6  | 806.5637 | C <sub>46</sub> H <sub>80</sub> NO <sub>8</sub> P | 27052247 | 16.0 |
| PC 39:6 |            | 822.5940 | C <sub>47</sub> H <sub>84</sub> NO <sub>8</sub> P | 3098835  | 1.8  |
| PC 40:6 | 18:0/22:6  | 834.5929 | C <sub>48</sub> H <sub>84</sub> NO <sub>8</sub> P | 10024963 | 5.9  |

**Table S3.** The composition of molecular species of phosphatidyl serine (PS) from the clams.

| PL      | Symbol     | M-       | Formula                                            | Area     | % in PS |
|---------|------------|----------|----------------------------------------------------|----------|---------|
| PS 36:1 | p18:0/18:1 | 772.5458 | C <sub>42</sub> H <sub>80</sub> NO <sub>9</sub> P  | 1463470  | 2.2     |
| PS 38:4 | p18:0/20:4 | 794.5213 | C <sub>44</sub> H <sub>78</sub> NO <sub>9</sub> P  | 907091   | 1.4     |
| PS 38:4 | p18:0/20:4 | 794.5242 | C <sub>44</sub> H <sub>78</sub> NO <sub>9</sub> P  | 727150   | 1.1     |
| PS 38:1 | p18:0/20:1 | 800.5756 | C <sub>44</sub> H <sub>84</sub> NO <sub>9</sub> P  | 17232642 | 26.3    |
| PS 39:1 | p18:0/21:1 | 814.5899 | C <sub>45</sub> H <sub>86</sub> NO <sub>9</sub> P  | 4344297  | 6.6     |
| PS 40:6 | p18:0/22:6 | 818.5221 | C <sub>46</sub> H <sub>78</sub> NO <sub>9</sub> P  | 4579900  | 7.0     |
| PS 40:6 | p18:0/22:6 | 818.5427 | C <sub>46</sub> H <sub>78</sub> NO <sub>9</sub> P  | 623300   | 1.0     |
| PS 40:5 | p18:0/22:5 | 820.5443 | C <sub>46</sub> H <sub>80</sub> NO <sub>9</sub> P  | 2894367  | 4.4     |
| PS 40:4 | p18:0/22:4 | 822.5648 | C <sub>46</sub> H <sub>82</sub> NO <sub>9</sub> P  | 2834565  | 4.3     |
| PS 40:2 | p18:0/22:2 | 826.5853 | C <sub>46</sub> H <sub>86</sub> NO <sub>9</sub> P  | 14902400 | 22.7    |
| PS 40:1 | p18:0/22:1 | 828.6057 | C <sub>46</sub> H <sub>88</sub> NO <sub>9</sub> P  | 2620077  | 4.0     |
| PS 34:2 | 17:1/17:1  | 758.4911 | C <sub>40</sub> H <sub>74</sub> NO <sub>10</sub> P | 988037   | 1.5     |
| PS 36:1 | 18:0/18:1  | 788.5367 | C <sub>42</sub> H <sub>80</sub> NO <sub>10</sub> P | 1202239  | 1.8     |
| PS 38:1 | 18:0/20:1  | 816.5536 | C <sub>44</sub> H <sub>84</sub> NO <sub>10</sub> P | 669399   | 1.0     |
| PS 38:1 | 18:0/20:1  | 816.5643 | C <sub>44</sub> H <sub>84</sub> NO <sub>10</sub> P | 1127650  | 1.7     |
| PS 39:6 | 17:0/22:6  | 820.494  | C <sub>45</sub> H <sub>76</sub> NO <sub>10</sub> P | 519379   | 0.8     |
| PS 40:6 | 18:0/22:6  | 834.5277 | C <sub>46</sub> H <sub>78</sub> NO <sub>10</sub> P | 5073205  | 7.7     |

|         |           |          |                                                    |         |     |
|---------|-----------|----------|----------------------------------------------------|---------|-----|
| PS 40:5 | 18:0/22:5 | 836.5383 | C <sub>46</sub> H <sub>80</sub> NO <sub>10</sub> P | 2887324 | 4.4 |
|---------|-----------|----------|----------------------------------------------------|---------|-----|

**Table S4.** The composition of molecular species of phosphatidylinositol (PI) from the clams.

| PL      | Symbol    | M-       | Formula                                           | Area     | % in PI |
|---------|-----------|----------|---------------------------------------------------|----------|---------|
| PI 36:5 | 16:0/20:5 | 855.4999 | C <sub>45</sub> H <sub>77</sub> O <sub>13</sub> P | 1439080  | 2.5     |
| PI 37:5 | 17:0/20:5 | 869.5255 | C <sub>46</sub> H <sub>79</sub> O <sub>13</sub> P | 715877   | 1.3     |
| PI 38:6 |           | 881.5084 | C <sub>47</sub> H <sub>79</sub> O <sub>13</sub> P | 483099   | 0.9     |
| PI 38:5 | 18:0/20:5 | 883.5242 | C <sub>47</sub> H <sub>81</sub> O <sub>13</sub> P | 9309764  | 16.4    |
| PI 38:4 | 18:0/20:4 | 885.5440 | C <sub>47</sub> H <sub>83</sub> O <sub>13</sub> P | 16989549 | 30.0    |
| PI 39:4 | 20:4/19:0 | 899.5606 | C <sub>48</sub> H <sub>85</sub> O <sub>13</sub> P | 799211   | 1.4     |
| PI 40:6 | 20:1/20:5 | 909.5449 | C <sub>49</sub> H <sub>83</sub> O <sub>13</sub> P | 8953275  | 15.8    |
| PI 40:5 | 20:1/20:4 | 911.5593 | C <sub>49</sub> H <sub>85</sub> O <sub>13</sub> P | 17534519 | 30.9    |
| PI 40:4 |           | 913.5701 | C <sub>49</sub> H <sub>87</sub> O <sub>13</sub> P | 490379   | 0.9     |

**Table S5.** The composition of molecular species of phosphatidylglycerol (PG) from the clams.

| PL      | Symbol    | M-       | Formula                                           | Area     | % in PG |
|---------|-----------|----------|---------------------------------------------------|----------|---------|
| PG 32:0 | 16:0/16:0 | 721.4975 | C <sub>38</sub> H <sub>75</sub> O <sub>10</sub> P | 26424206 | 100     |

**Table S6.** The composition of molecular species of ceramide aminoethylphosphonate (CAEP) from the clams.

| PL        | Symbol     | M-       | Formula                                                         | Area     | % in CAEP |
|-----------|------------|----------|-----------------------------------------------------------------|----------|-----------|
| CAEP 34:3 | 16:0/d18:3 | 639.4817 | C <sub>36</sub> H <sub>69</sub> N <sub>2</sub> O <sub>5</sub> P | 62084084 | 14.6      |
| CAEP 34:2 | 16:2/d18:0 | 641.4994 | C <sub>36</sub> H <sub>71</sub> N <sub>2</sub> O <sub>5</sub> P | 74898407 | 17.6      |
| CAEP 34:1 | 16:0/d18:1 | 643.5137 | C <sub>36</sub> H <sub>73</sub> N <sub>2</sub> O <sub>5</sub> P | 1094052  | 0.3       |
| CAEP 34:1 |            | 643.5145 | C <sub>36</sub> H <sub>73</sub> N <sub>2</sub> O <sub>5</sub> P | 54701373 | 12.9      |
| CAEP 35:3 | 16:0/d21:3 | 653.4990 | C <sub>37</sub> H <sub>71</sub> N <sub>2</sub> O <sub>5</sub> P | 40643458 | 9.6       |
| CAEP 35:2 | 17:0/d18:2 | 655.5124 | C <sub>37</sub> H <sub>73</sub> N <sub>2</sub> O <sub>5</sub> P | 24780958 | 5.8       |
| CAEP 35:1 | 16:0/d19:1 | 657.5291 | C <sub>37</sub> H <sub>75</sub> N <sub>2</sub> O <sub>5</sub> P | 66718626 | 15.7      |
| CAEP 35:0 |            | 659.5423 | C <sub>37</sub> H <sub>77</sub> N <sub>2</sub> O <sub>5</sub> P | 6139719  | 1.4       |
| CAEP 36:2 |            | 669.5300 | C <sub>38</sub> H <sub>75</sub> N <sub>2</sub> O <sub>5</sub> P | 5837542  | 1.4       |
| CAEP 36:1 | 17:0/d19:1 | 671.5453 | C <sub>38</sub> H <sub>77</sub> N <sub>2</sub> O <sub>5</sub> P | 20568570 | 4.8       |
| CAEP 37:3 | 18:0/d19:3 | 681.5287 | C <sub>39</sub> H <sub>75</sub> N <sub>2</sub> O <sub>5</sub> P | 36620992 | 8.6       |
| CAEP 37:3 | 18:0/d19:3 | 681.5294 | C <sub>39</sub> H <sub>75</sub> N <sub>2</sub> O <sub>5</sub> P | 2260798  | 0.5       |
| CAEP 37:2 | 18:0/d19:2 | 683.5487 | C <sub>39</sub> H <sub>77</sub> N <sub>2</sub> O <sub>5</sub> P | 3669098  | 0.9       |
| CAEP 37:1 | 18:0/d19:1 | 685.5565 | C <sub>39</sub> H <sub>79</sub> N <sub>2</sub> O <sub>5</sub> P | 3745037  | 0.9       |
| CAEP 36:3 |            | 667.4975 | C <sub>38</sub> H <sub>73</sub> N <sub>2</sub> O <sub>5</sub> P | 20841736 | 4.9       |

## Supplementary B: Figures

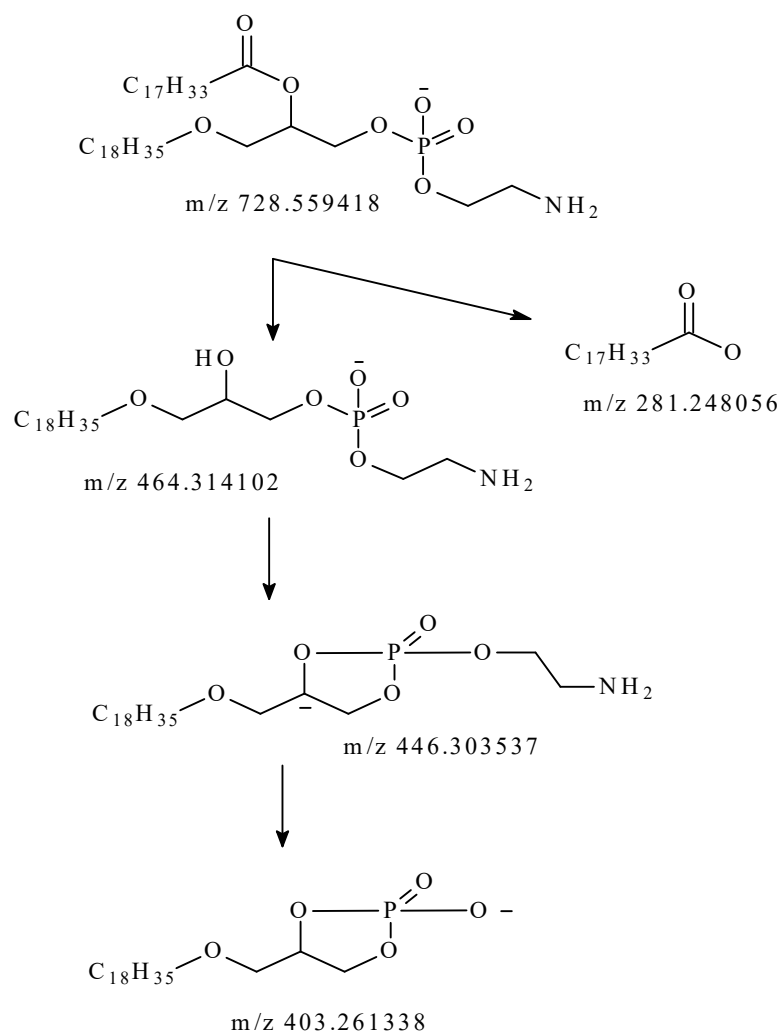

**Figure S1.** Fragmentation pathways of PE 36:1.

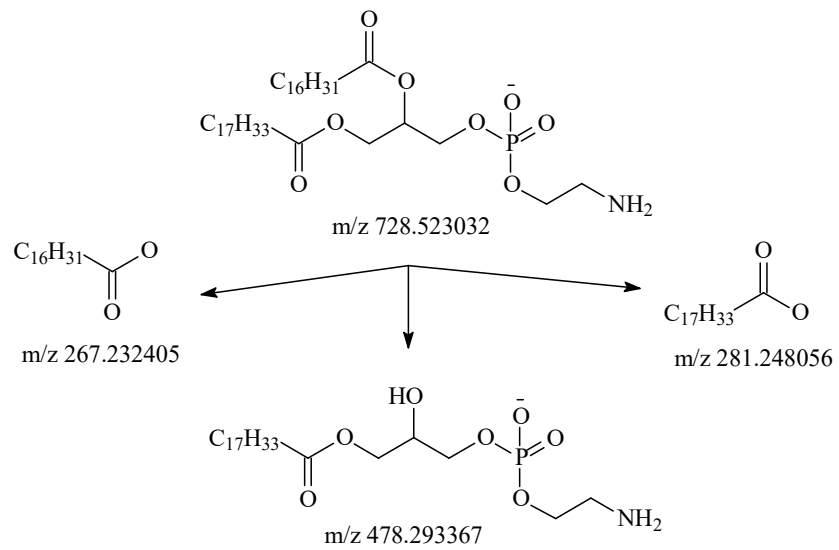

**Figure S2.** Fragmentation pathways of PE 35:2.

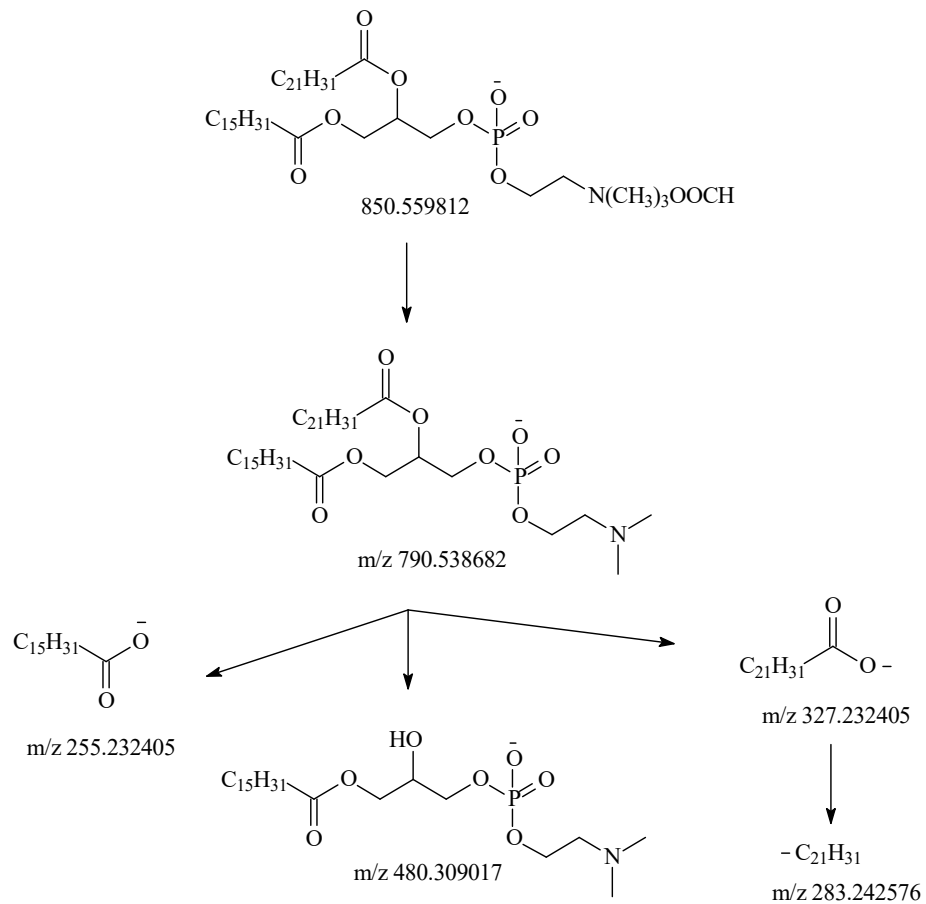

**Figure S3.** Fragmentation pathways of PC 38:6.

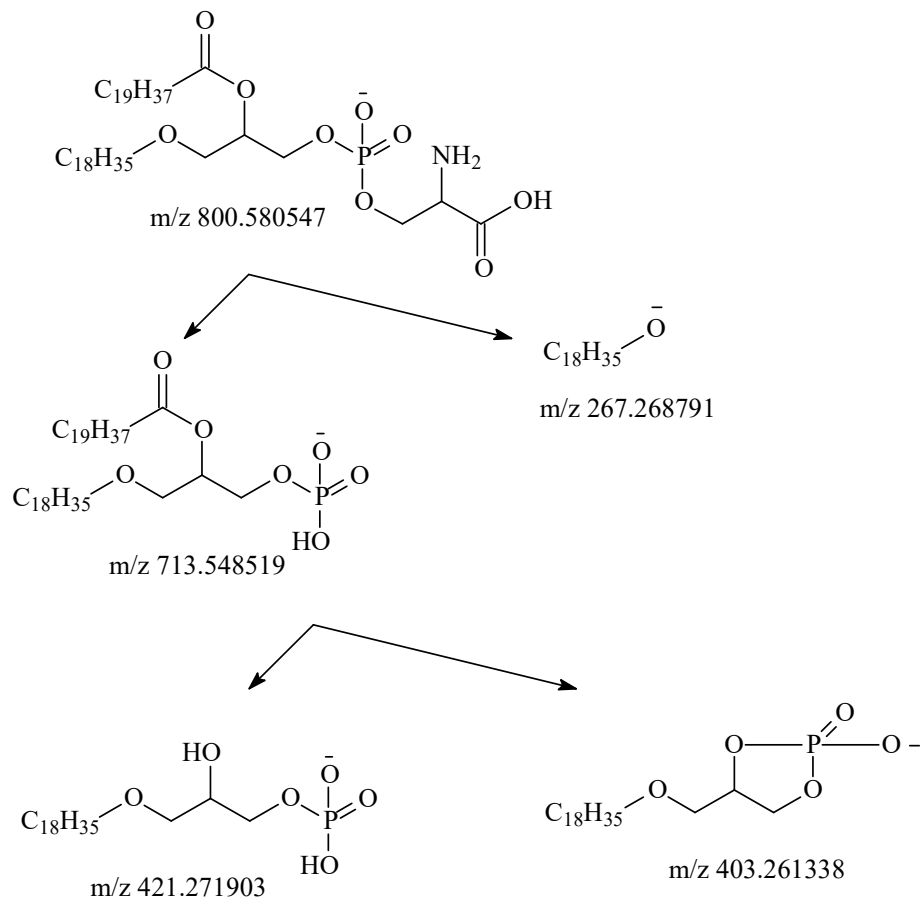

**Figure S4.** Fragmentation pathways of PS 38:1.

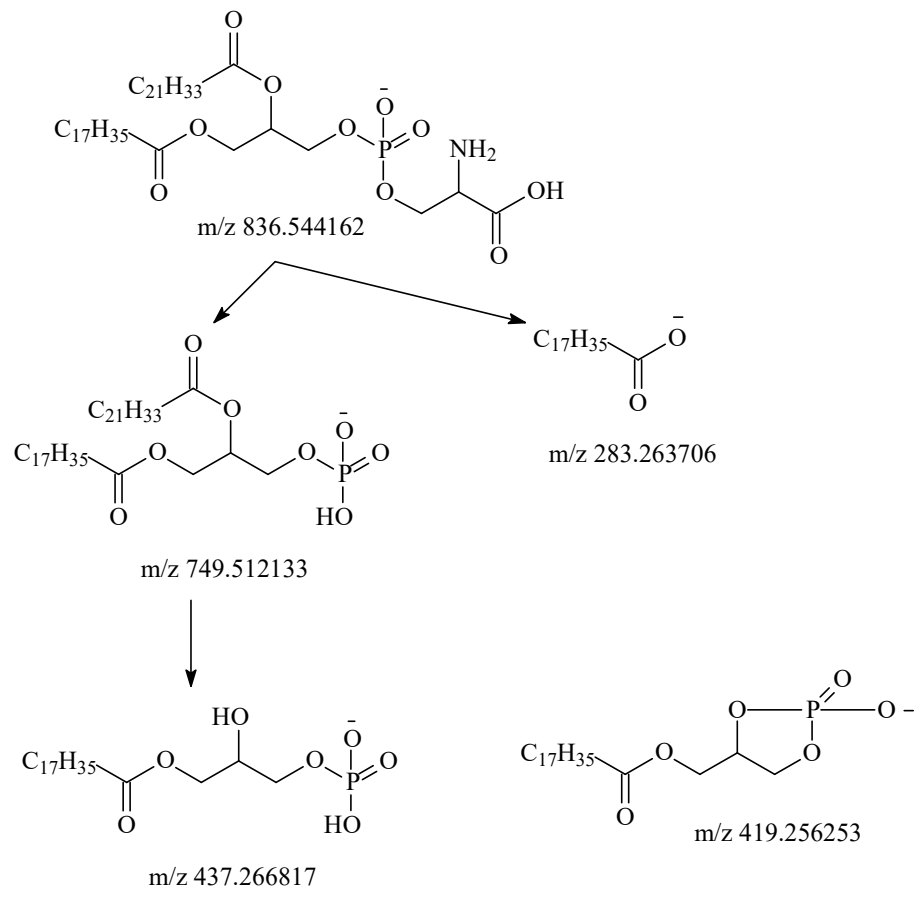

**Figure S5.** Fragmentation pathways of phosphatidylserine (PS 40:5).



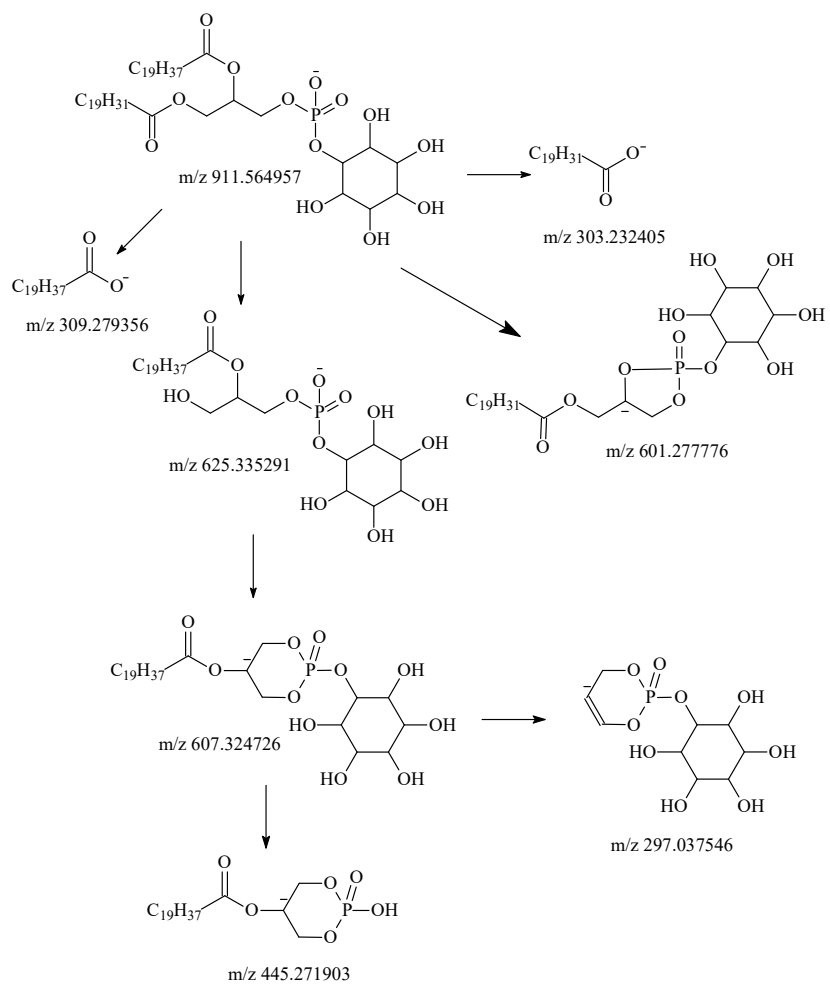

**Figure S6.** Fragmentation pathways of PI 40:5.

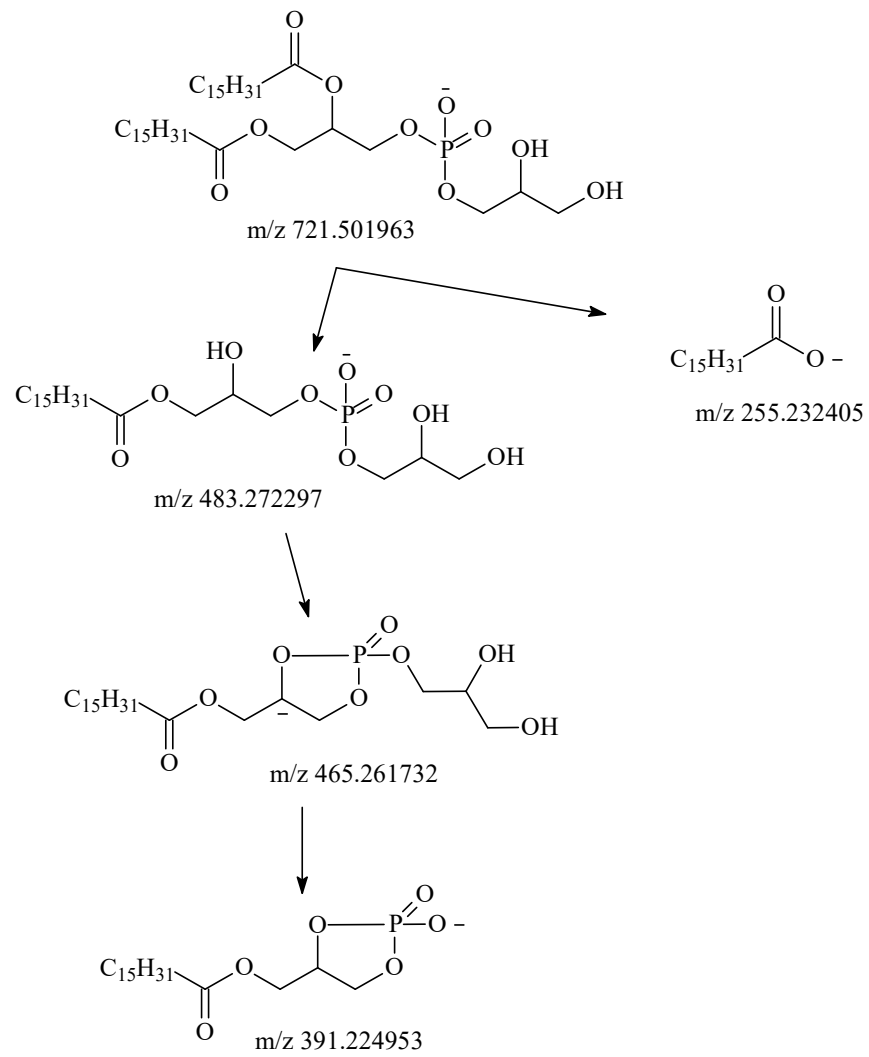

**Figure S7.** Fragmentation pathways of PG 32:0.

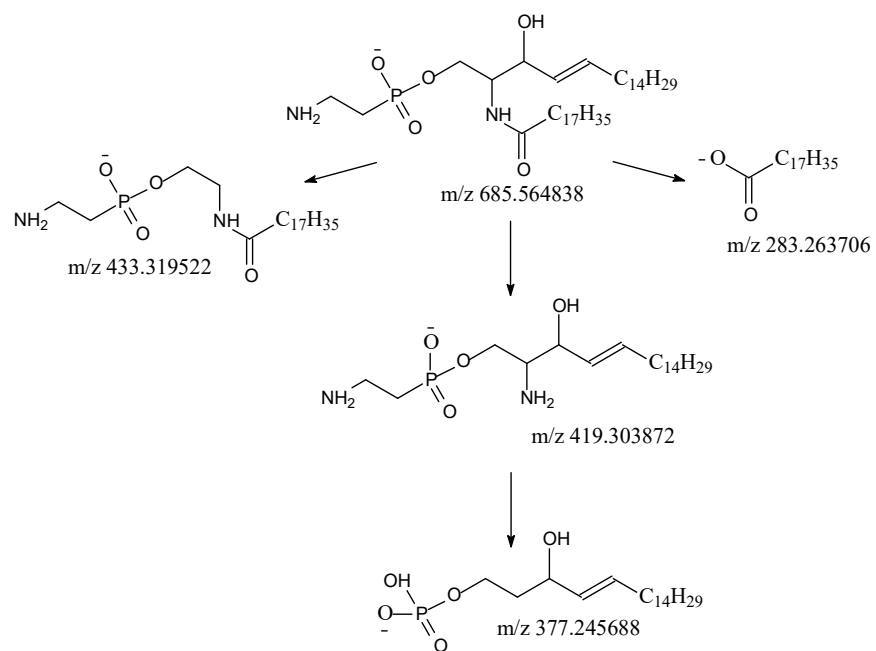

**Figure S8.** Fragmentation pathways of CAEP 37:1.
